# Supplementary material for: Advanced halide/sulfide all-solid-state lithium metal batteries with fluorinated interface layer
Source: Royal Society of Chemistry journal article supplement (doi:10.1039/d5cc05658f), 2025-12-09
Supplement: d5cc05658f1.pdf [file d5cc05658f1.pdf]

## Advanced halide/sulfide all-solid-state lithium metal batteries with fluorinated interface layer

Shuangwu Xu,<sup>a</sup> Na Chen,<sup>a</sup> You Huang,<sup>a</sup> Dan Sun,<sup>a</sup> Huanhuan Li,<sup>b</sup> Huapeng Sun,<sup>c</sup> Zhiguang Peng,<sup>a\*</sup>

Yougen Tang,<sup>a</sup> Hehe Zhang,<sup>d\*</sup> and Haiyan Wang <sup>a\*</sup>

<sup>a</sup> Hunan Provincial Key Laboratory of Chemical Power Sources, College of Chemistry and Chemical Engineering, Central South University, Changsha 410083, China

<sup>b</sup> School of Chemistry and Chemical Engineering, Henan Normal University, Xinxiang 453007, P. R. China

<sup>c</sup> School of New Energy, Chenzhou Vocational Technical College; Chenjiang Laboratory, Chenzhou, Hunan 423000, China

<sup>d</sup> School of Energy and Mechanical Engineering, Nanjing Normal University, Nanjing 210023, China

\* Corresponding author

E-mail addresses: wanghy419@csu.edu.cn (Haiyan Wang)

## **Experimental Section**

### **1. Synthesis of Solid-State Electrolytes**

$\text{Li}_3\text{InCl}_6$  (abbreviated as LIC) was prepared by ball-milling. LIC was synthesized by ball-milling a mixture of lithium chloride (LiCl, Sigma Aldrich, 99%) and indium chloride ( $\text{InCl}_3$ , Sigma Aldrich, 99.99%) at a 3:1 molar ratio under an argon (Ar) atmosphere at 500 rpm for 12 hours. To enhance the crystallinity of LIC, the ball-milled powder was sintered at 300 °C for 5 hours, producing LIC@300 °C. Note that, unless otherwise specified, all SSEs tested in this study were ball-milled LIC without thermal treatment.

The argyrodite  $\text{Li}_6\text{PS}_5\text{Cl}$  (denoted as LPSC) was prepared by the ball-milling method. First, lithium sulfide ( $\text{Li}_2\text{S}$ , Sigma Aldrich, 99.98%), phosphorus pentasulfide ( $\text{P}_2\text{S}_5$ , Sigma Aldrich, 99%), and lithium chloride (LiCl, Sigma Aldrich, 99%) were mixed in a 5:1:2 molar ratio and ball-milled for 12 hours at 500 rpm in an Ar atmosphere. The resulting powder was then sintered at 550 °C under an Ar atmosphere for 5 hours to prepare LPSC.

### **2. Pre-treatment of lithium metal anodes**

A CR2016-type Li|Li symmetric coin cell was assembled using an electrolyte consisting of 1 M  $\text{LiPF}_6$  in DME:EC:EMC (1:1:1 by volume) with 5 vol% FEC additive. The cell was subjected to one galvanostatic charge–discharge cycle at a current density of  $0.02 \text{ mA cm}^{-2}$  and a capacity limit of  $0.2 \text{ mAh cm}^{-2}$ . After cycling, the cell was carefully disassembled. The metallic lithium anode was retrieved and thoroughly rinsed to remove any residual electrolyte, yielding the final pretreated lithium anode.

### **3. Material Characterization**

The crystal structures of SSEs were confirmed by powder X-ray diffraction (XRD, SmartLab

3kW, Rigaku Corporation) using Cu-K $\alpha$  radiation. The microscopic morphology of the materials was observed using field emission scanning electron microscopy (FE-SEM, TESCAN MIRA3), while the elemental distribution of the samples was determined using energy dispersive spectroscopy (EDS, Bruker Quantax 6|30 detector). X-ray photoelectron spectroscopy (XPS) measurements were performed on a Thermo Fisher Scientific NEXSA system.

#### **4. Electrochemical Measurements**

**Conductivity measurements:** Ionic conductivity was measured by cold-pressing 100 mg of SSE powder into pellets using a polyetheretherketone (PEEK) mold (inner diameter: 10 mm) under a pressure of 450 MPa. Stainless steel ion-blocking electrodes were employed. Electrochemical impedance spectroscopy (EIS) was performed using an electrochemical workstation (Multi Autolab/M204) over a frequency range of 1 MHz to 1 Hz to obtain Nyquist plots. The temperature-dependent ionic conductivity was measured between 20 and 60 °C, and the activation energy was calculated using the Arrhenius equation. For the bilayer SSE, 40 mg of LPSC powder was first pre-compressed at 100 MPa. Subsequently, 60 mg of LIC powder was added, and the bilayer pellet was cold-pressed at 450 MPa for ionic conductivity testing.

**Battery assembly and testing:** All-solid-state lithium metal batteries were assembled in an argon-filled glove box ( $\text{H}_2\text{O} < 0.1$  ppm,  $\text{O}_2 < 0.1$  ppm). The composite cathode was prepared by uniformly mixing commercial lithium cobalt oxide (LCO) powder with halide SSE powder at a 7:3 mass ratio in an agate mortar. For cell assembly, 40 mg of sulfur-based SSE (LPSC) powder was added to a PEEK mold (10 mm inner diameter) and pressed at  $\sim 100$  MPa to form the first electrolyte layer. Subsequently, 60 mg of LIC powder was added on the LPSC layer and cold-pressed at  $\sim 100$  MPa to form a bilayer electrolyte structure. Approximately 10.5 mg of the composite cathode

powder was then uniformly distributed onto the LIC layer and pressed at ~450 MPa for 10 minutes to ensure interfacial adhesion. Finally, a lithium metal anode (either Li or FEC@Li, 10 mm in diameter) was placed on the LPSC side and pressed at ~60 MPa to ensure contact. The cells were cycled between 2.6 and 4.2 V (vs. Li/Li<sup>+</sup>) at 30 °C using a NEWARE battery testing system to evaluate their rate capability and cycling performance.

## **5. Density Functional Theory Calculation**

The highest occupied molecular orbital (HOMO) and lowest unoccupied molecular orbital (LUMO) energy levels of the solvent molecules were calculated using the DMol<sup>3</sup> module in Materials Studio 2021 (Accelrys Inc.).<sup>s1</sup> All structures underwent geometry optimization followed by orbital energy calculations within the DMol<sup>3</sup> module. The exchange-correlation functional was described by the Becke three-parameter hybrid functional combined with the Lee-Yang-Parr correlation functional (B3LYP).<sup>s2</sup> Calculations employed an all-electron numerical basis set (Double Numerical plus polarization, DNP) with a basis file version 4.4. The Tkatchenko-Scheffler (TS) method was applied for van der Waals corrections.<sup>s3</sup> Convergence criteria were set to:  $1.0 \times 10^{-5}$  Ha for energy,  $2.0 \times 10^{-3}$  Ha Å<sup>-1</sup> for maximum force, and  $5.0 \times 10^{-3}$  Å for maximum displacement.



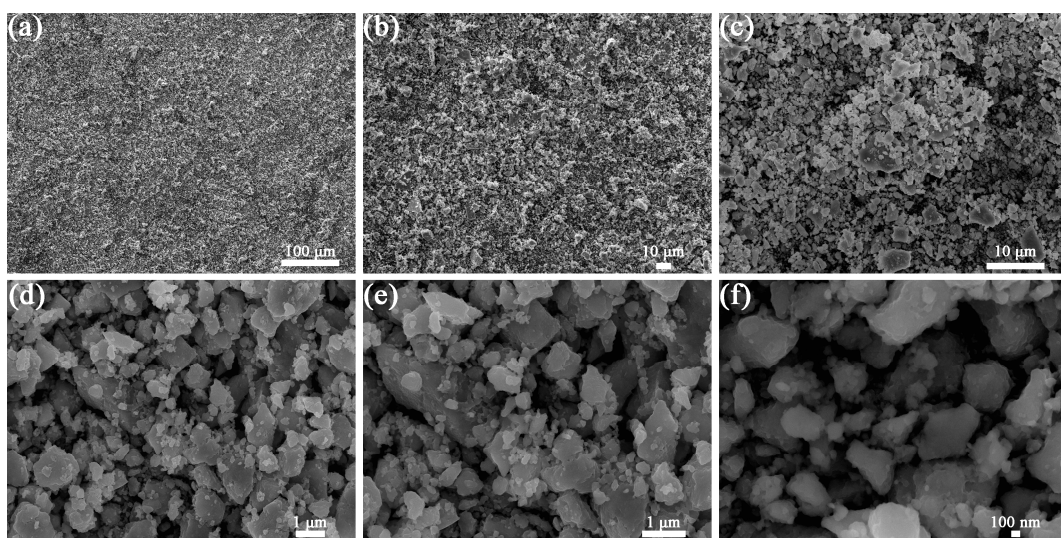

**Fig. S1.** SEM images of  $\text{Li}_3\text{InCl}_6$  at different magnifications.

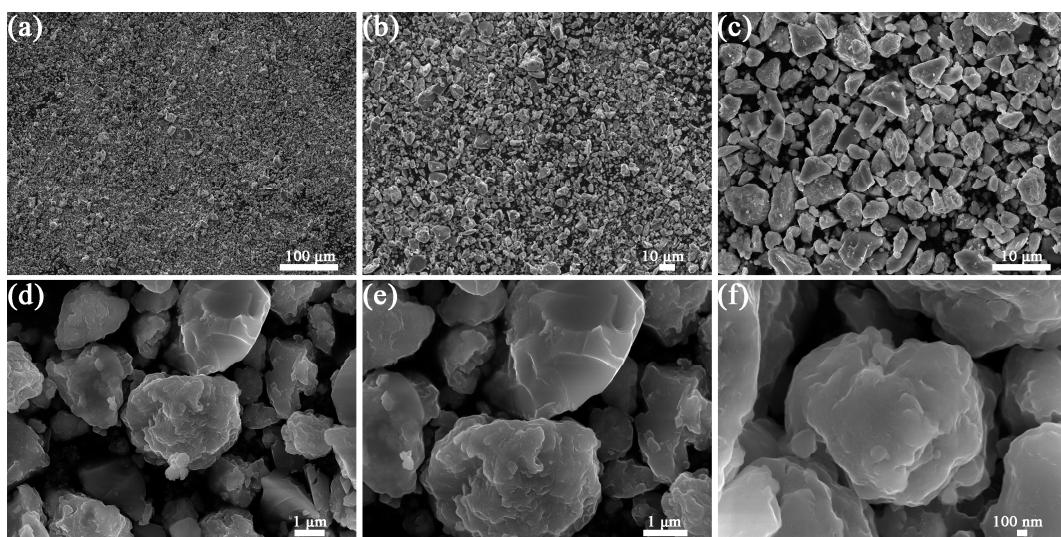

**Fig. S2.** SEM images of  $\text{Li}_6\text{PS}_5\text{Cl}$  at different magnifications.

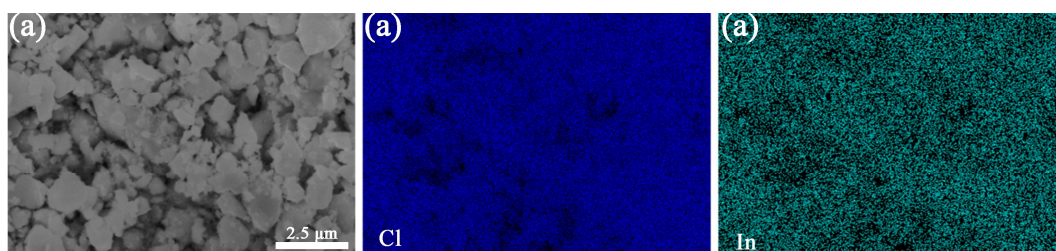

**Fig. S3.** EDS mapping images of  $\text{Li}_3\text{InCl}_6$ .

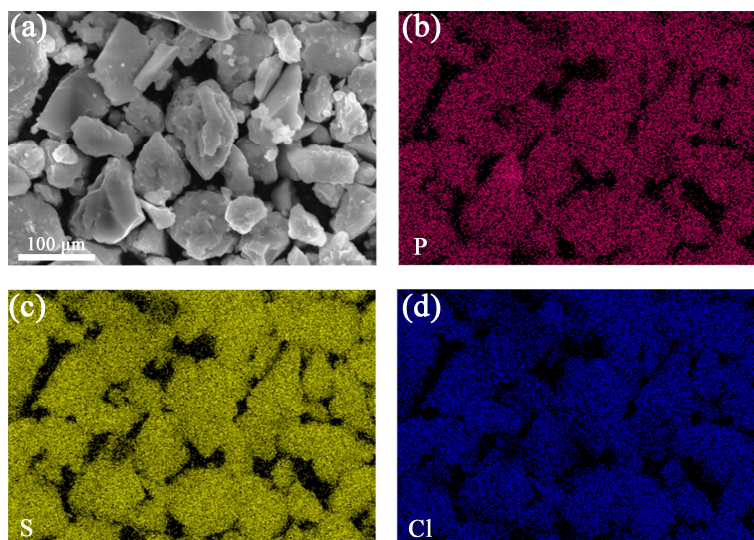

**Fig. S4.** EDS mapping images of  $\text{Li}_6\text{PS}_5\text{Cl}$ .

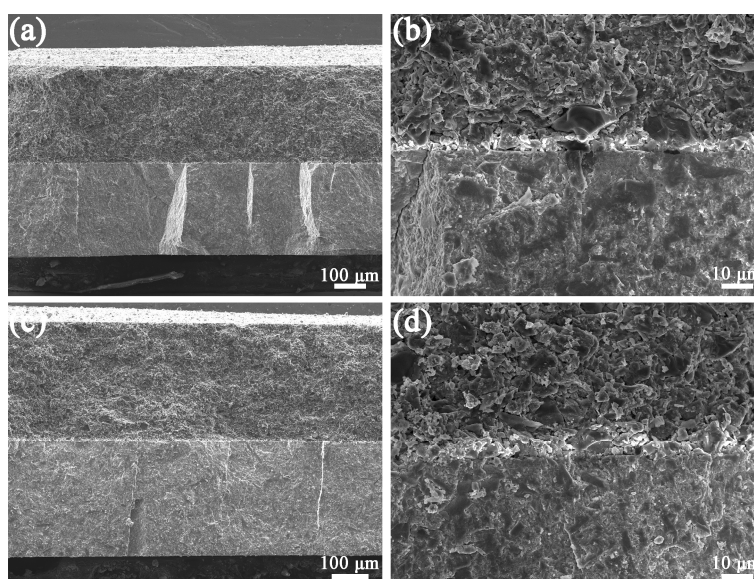

**Fig. S5.** SEM images of the cross-section of the bilayer SSE at different magnifications.



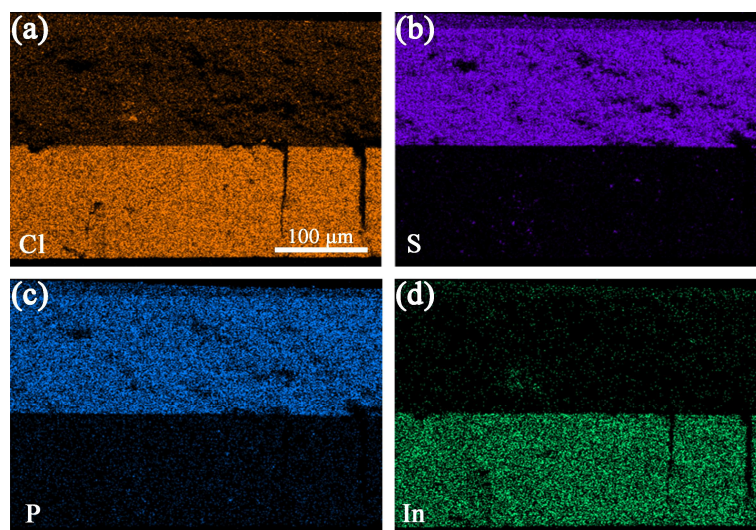

**Fig. S6.** EDS mapping images of the cross-section of the bilayer SSE.

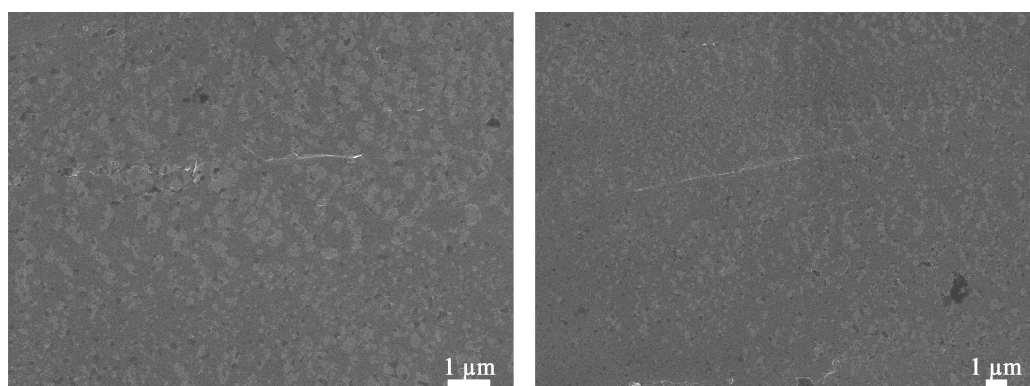

**Fig. S7.** SEM images of the surface of bare Li.

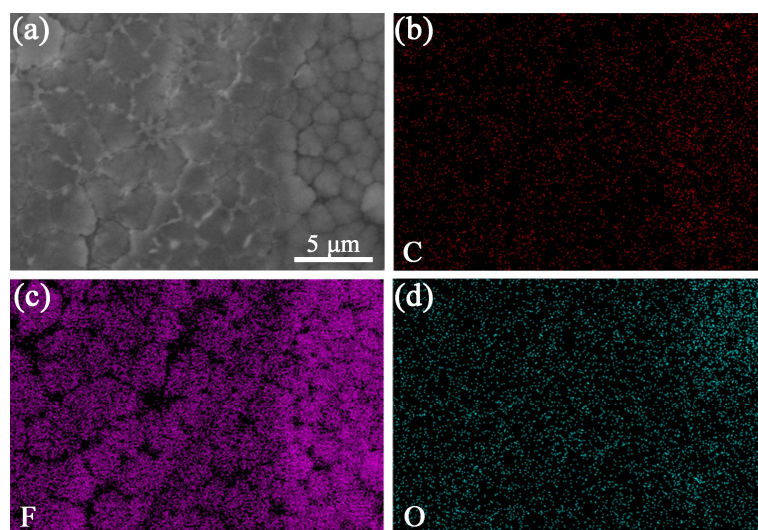

**Fig. S8.** EDS mapping images of the FEC@Li surface.

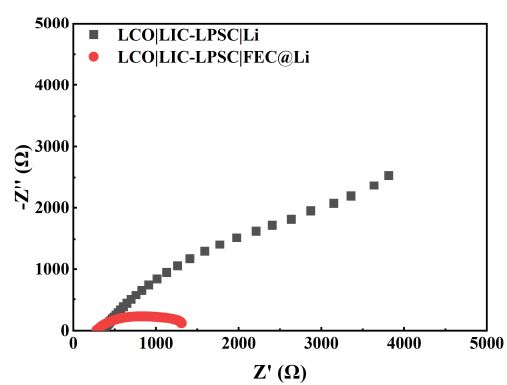

**Fig. S9.** EIS curves of LCO|LIC-LPSC|Li and LCO|LIC-LPSC|FEC@Li batteries.

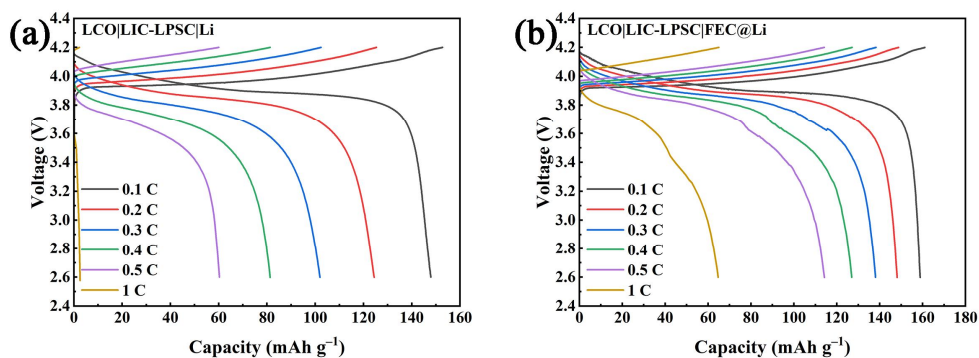

**Fig. S10.** Charge and discharge curves of LCO|LIC-LPSC|Li and LCO|LIC-LPSC|FEC@Li batteries at different rates.

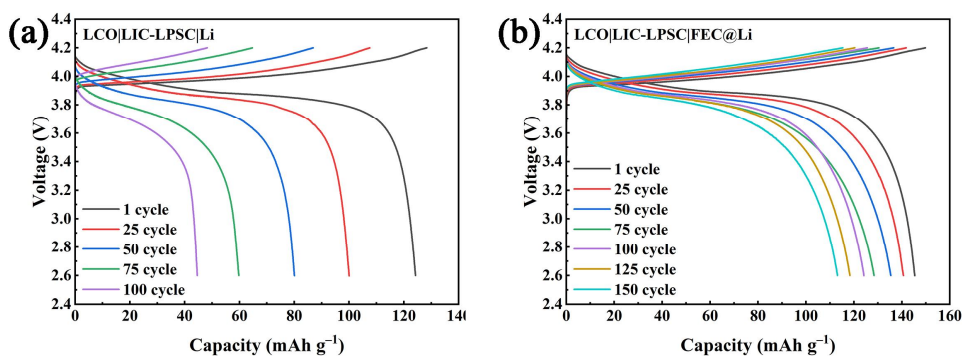

**Fig. S11.** Charge and discharge curves of LCO|LIC-LPSC|Li and LCO|LIC-LPSC|FEC@Li batteries at 0.2 C.

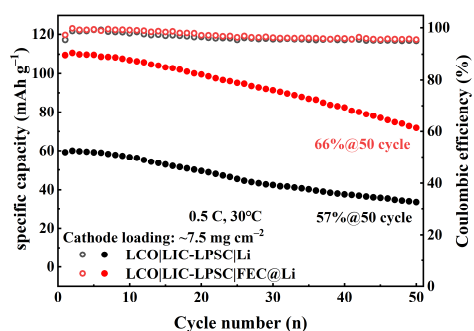

**Fig. S12.** Long cycle performance of LCO|LIC-LPSC|Li and LCO|LIC-LPSC|FEC@Li batteries.

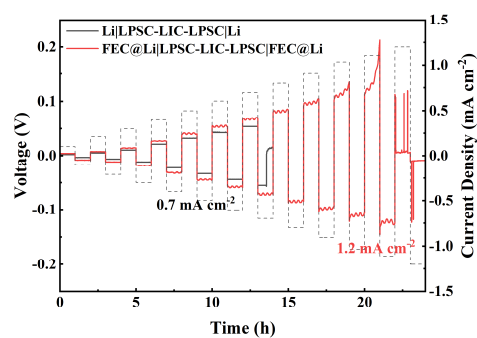

**Fig. S13.** The CCD test of symmetric cells with stepwise-increased current density.

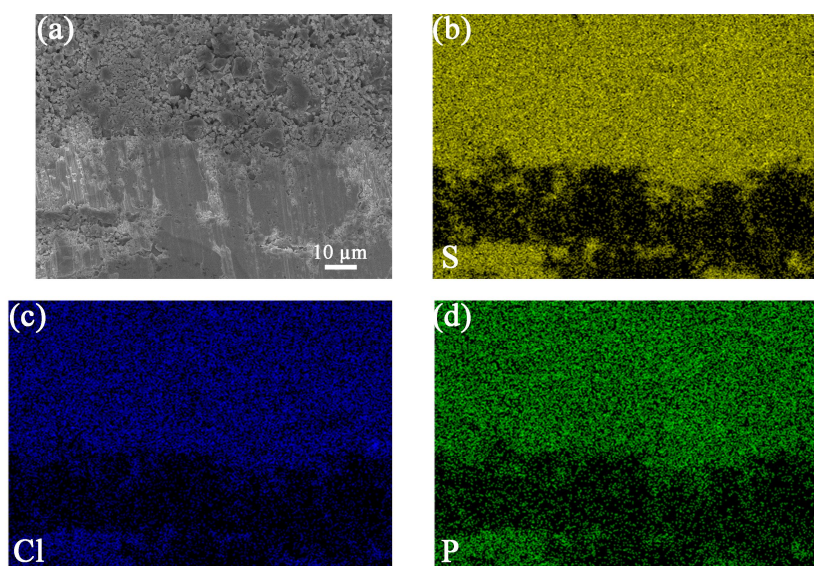

**Fig. S14.** (a) Cross-sectional SEM image and (b-d) corresponding EDS elemental maps images of the FEC@Li | LPSC | FEC@Li symmetric cell after cycling for 20 h at  $0.3 \text{ mA cm}^{-2}$ .

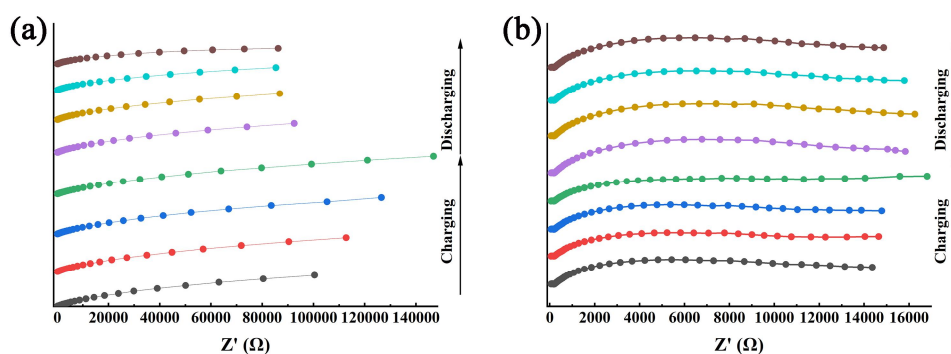

**Figure S15.** In situ EIS curves of Li|LPSC|Li and FEC@Li|LPSC|FEC@Li symmetric cells.

## References

1. B. Delley, *The Journal of Chemical Physics*, 2000, **113**, 7756-7764.
2. A. D. Becke, *The Journal of Chemical Physics*, 1992, **96**, 2155-2160.
3. A. Tkatchenko and M. Scheffler, *Physical Review Letters*, 2009, **102**, 073005.
